# Supplementary material for: High-Sensitivity and High-Resolution In Situ Hybridization of Coding and Long Non-coding RNAs in Vertebrate Ovaries and Testes
Source: PubMed Central journal article supplement (PMC5831722; doi:10.1186/s12575-018-0071-z), 2018-03-01
Supplement: 12575_2018_71_MOESM1_ESM.pdf [file 12575_2018_71_MOESM1_ESM.pdf]

Table S1. Reagents used in this study.

---

Slide coating

- Gelatin powder (Wako Pure Chemical Industries, Ltd., cat.no. 077-03155)

Paraffin sections

- Isoamyl acetate (Wako Pure Chemical Industries, Ltd., cat.no. 016-03646)
- Lemosol (Wako Pure Chemical Industries, Ltd., cat.no. 128-03993)
- Paraffin (Fisher Scientific; melting point, 56-57°C, cat.no. T-565-1)

Stock solutions

- Torula RNA (Sigma, cat.no. R6625)

Probe preparation

- SP6 RNA polymerase (Roche, cat.no. 810 274)
- T7 RNA polymerase (Roche, cat.no. 881 767)
- T3 RNA polymerase (Roche, cat.no. 1 031 163)
- DIG RNA Labeling Mix (Roche, cat.no. 1 277 073)
- Fluorescein RNA Labeling Mix (Roche, cat.no. 1 685 619)

Proteinase K stimulation

- Proteinase K (Sigma, cat.no. P2308)

Hybridization

- RNase A (Sigma, cat.no. R4875)

Detection of DIG- and fluorescein-labeled RNA probes

- Blocking reagent (PerkinElmer, Inc., cat.no. FP1020)
- Anti-DIG-HRP antibody (Roche, cat.no. 1 207 733)
- Anti-Fluorescein-HRP antibody (Roche, cat.no. 1 426 346)
- Anti-DNP-AP antibody (PerkinElmer, Inc., cat.no. NEL746A)
- Anti-DNP-Alexa 488 antibody (Molecular Probes, cat.no. A-11097)
- Tyramide-DNP (PerkinElmer, Inc., cat.no. NEL746A)
- Tyramide-Cy3 (PerkinElmer, Inc., cat.no. NEL744)
- Tyramide-Fluorescein (PerkinElmer, Inc., cat.no. NEL741)

Mounting

- Prolong Antifade Kit (Molecular probes, cat.no. P7184)
  - Fluoro-KEEPER Antifade Reagent (Nacalai Tesque, cat.no. 12593-64)
-

Table S2. RNA probes used for detection of target mRNAs.

| Species   | Transcripts          | Labeling         | Strands         |
|-----------|----------------------|------------------|-----------------|
| Mouse     | <i>Pou5f1/Oct4</i>   | DIG              | Antisense/Sense |
| Zebrafish | <i>mos</i>           | Fluorescein      | Antisense/Sense |
| Zebrafish | <i>cyclin B1</i>     | DIG, Fluorescein | Antisense/Sense |
| Zebrafish | <i>dazl</i>          | DIG              | Antisense/Sense |
| Mouse     | <i>Cyclin B1</i>     | Fluorescein      | Antisense/Sense |
| Mouse     | <i>Dazl</i>          | DIG              | Antisense/Sense |
| Mouse     | <i>lncRNA-HSVIII</i> | DIG, Fluorescein | Antisense/Sense |

Table S3. Sequences of transcripts used for making RNA probes in this study.

Mouse *Pou5f1/Oct4*

GAGGTGAAACCGTCCCTAGGTGAGCCGTCTTTCCACCAGGCCCCCGGCTCGGGGTGCCCA  
CCTTCCCCATGGCTGGACACCTGGCTTCAGACTTCGCCTTCTCACCCCCACCAGGTGGGG  
GTGATGGGTCAGCAGGGCTGGAGCCGGCTGGGTGGATCCTCGAACCTGGCTAAGCTTCC  
AAGGGCCTCCAGGTGGGCCTGGAATCGGACCAGGCTCAGAGGTATTGGGGATCTCCCAT  
GTCCGCCCCGATACGAGTTCTGCGGAGGGATGGCATACTGTGGACCTCAGGTTGGACTGG  
GCCTAGTCCCCAAGTTGGCGTGGAGACTTTGCAGCCTGAGGGCCAGGCAGGAGCACGAG  
TGAAAGCAACTCAGAGGGAACCTCCTCTGAGCCCTGTGCCGACCGCCCCAATGCCGTGA  
AGTTGGAGAAGGTGGAACCAACTCCCGAGGAGTCCAGGACATGAAAGCCCTGCAGAAGG  
AGCTAGAACAGTTTGCCAAGCTGCTGAAGCAGAAGAGGATCACCTTGGGGTACACCCAGG  
CCGACGTGGGGCTCACCTGGGCGTTCTCTTTGGAAAGGTGTTTCAGCCAGACCACCATCT  
GTCGCTTCGAGGCCTTGCACTCAGCCTTAAGAACATGTGTAAGCTGCGGCCCTGCTGG  
AGAAGTGGGTGGAGGAAGCCGACAACAATGAGAACCCTCAGGAGATATGCAAATCGGAGA  
CCCTGGTGCAGGCCCGGAAGAGAAAGCGAACTAGCATTGAGAACCCTGTGAGGTGGAGTC  
TGAGACCATGTTTCTGAAGTGCCGAAGCCCTCCCTACAGCAGATCACTCACATCGCCA  
ATCAGCTTGGGCTAGAGAAGGATGTGGTTCGAGTATGGTTCGTAAACGGCGCCAGAAGG  
GCAAAGATCAAGTATTGAGTATTCCCAACGAGAAGAGTATGAGGCTACAGGGACACCTT  
TCCCAGGGGGGGCTGTATCCTTTCTCTGCCCCAGGTCCCACCTTGGCACCCAGGCT  
ATGGAAGCCCCACTTCACCACACTCTACTCAGTCCCTTTTCTGAGGGCGAGGCCTTTC  
CCTCTGTTCCCGTCACTGCTCTGGGCTCTCCCATGCATTCAAACCTGAGGCACCAGCCCTC  
CCTGGGGATGCTGTGAGCCAAGGCAAGGGAGGTAGACAAGAGAACCCTGGAGCTTTGGGGT  
TAAATTCTTTTACTGAGGAGGGATTAAAAGCACAACAGGGGTGGGGGTGGGATGGGGAA  
AGAAGCTCAGTGATGCTGTTGATCAGGAGCCTGGCCTGTCTGTCACTCATCATTTTGTTC  
TTAAATAAAGACTGGGACACACAGTAGATAGCT

Zebrafish *mos*

AAATTAGCGACCAGCTCTCCGATTTACAGTTATCATGCGCCATGCCCTCACCAATCCCC  
GTCACCCGACTTTTGGCAAAGGATTTGCGCCTCGAGTTTGGCGCATGCAGCAGCCCGCTG  
ACCAAACTGCCAGTGGATCTACCCTGCGCGTGCCACAAACAAGTTTCATGGTAAAGTC  
GCACACAGGCTCTGGTCTCCGTGATCCACTGGCGCGAGCTGCAGGCTCTGGAGCCATA  
GGCAGCGGTGGATTCCGTACGGTGTTCAGAGGCACATACTTCGGCGAGACTGTCGCTGTG  
AAAAAGGTCAAGTGTGTGAAAAACAACCTGGCATCGAGGCAAAGTTTCTGGGCGGAACTC  
AACGCCGCGCACCTGCACCATCAAACATTTGTGCGCGTGCTCGCGGCCACCACGTGCACT  
CCTGCGCATCTCAACACCAAAGACAACATCGGGACGATCGTAATGGAGTTCGCAGGCAAT  
ATAAATCTACAGAAGCTCATTTATGGGCTCACAGACTTGCTTCTGTGGAGAAGTGTATA  
AAGTATTTCAATAGACATCGCGCGCGCCCTCCAGCACCTGCACGCGCACGGCGTAGTGCAC  
CTGGATTTAAAACCAGCCAATGTCTTGTGTTGTCAGAACAGGGTGTGTTGTAATAATCGCAGAT  
TTTGGGTGCTCGTTTAAATATCCAGCACAAAGTGACACCGTGACGCACATGAATGAAATC  
GGCGGCACGTTTACGCACCGGGCGCCCGAGCTGCTGAAAGGTGAGGAAGTGTGCGCCGCGC  
GTGGACGTTTATTCTTTTGGCATAACGTTGTGGCAGCTGCTCACCCGAGAGCCGCCCTAT  
GAGGGAGACAGACAGTATATCCTGTACGCTGTTGTGGGGTATAACCTGCGCCCTTTGACC  
AGCAGGAATGTTTTTACCCAGTTTTTTTATTTGGACAGAATTGTCAAAAACCTGATCAGCCGG  
TGTTGGGACGGCGACCCAGCATCCGACCGACCGCAGATAAGTTTGTGACGAACTTTCA  
GTTTTACTGTAAATTTGAATCTCCGCGTTTGCAAAAAAAAAAAAAAAAAAAAAAAAATCTTCAAT  
GAAACGTTTTTTTTATAACAATTTGTTTAAATATTGTAATGTTTCGTGTTTTTGTGTTTTATTGT  
GAAGCTAAATTTTTTATGCAAAAATGTTTAAATTAATGTTTCCTTGTGTTT

Zebrafish *cyclin B1*

GGCACGAGTAAACCTCTGTAGAGAAATAGTGCTATATTGAGCTCGCTTGAGTAGATTTTACCAGTTTGTTCATCGAGTCACAGCAATAAACCCACGAGAAATGATGGCTCTCCGTGTCACAGGAACACTCGCCTGGCCAGCAGCGAGAATCAGAACGCTCTGCCCGGAAAAGCAGTTGTAGCGAACAAGCCCCGACTCAGACCAAGGGCCGCGCTGGGGGAGATTGGCAACAATCCGCAAACACGACAGGCTTTGAAGAAGAAGGAGGTGAAGGTTGCACCCGCCGCCGAGGTGTGGTTGAGAAGGCACCTGTGGTTCAACAGCCCAAGAAGGATTCTCCTAAGGTTCAACATGGCGTTAAGGTGTGTCTGAGCCTTCCTCTCCTGTTCCTATGGAGACCTCCGGCTGTGCTTCAGATGATCTGTGTCAAGCATTCTCTGATGTTCTGCTTAATATCAAGGATGTTGACGCAGATGATTATGATAATCCCATGCTTTGCAGTGAATATGTCAAGGACATCTATTTGTATTTGCGCCAGCTTGAGACTGAACAAGCTGTAAGGCCAAAATATCTGGCAGGAAAGGAAGTTACTGGGAACATGCGTGCCATTCTTATCGACTGGCTTGTGCAAGTCCAGATTAAGTTTAGGCTGCTTCAGGAGACCATGTACATGACTGTTGCCATCATCGATCGCTTCCTTCAGGATCATCCAGTTCCAAGAAGCAGCTGCAACTTGTGGTGTAAACGGCCATGTTTCATCGCCTCAAATATGAAGAAATGTACCCACCAGAGATTGCAGACTTTGCTTTTGTGACAGACCGTGCATACACCACCAGTCAGATCCGGGAGATGGAGATGAAGTCTGAGAGTCTCAACTTTGGTTTTGGAAGGCCTCTACCACTACAGTTTCTCAGGAGGGCCTCCAAGATTGGAGATGTGACTGCAGAACATCACACATTAGCGAAATATTTCTGGAGCTCACCATGGTCGATTATGACATGGTCCACTACCCTCCCTCTCAGATGGCCAGTGCTGCTTATGCCCTGACCCTGAAGGTCTTCAACTGTGGTGACTGGACCCCTACTCTTCAGCACTACATGGGCTACACTGAAGATGAGCTGGTTCCCTGTGATGCAGCATATTGCCAAAATGTTGTGAGGGTCAACGAGGGCCTTCTAAGCATCTGGCTGTGAAGAATAAGTACTCCAGTCAGAAGCAGATGAGAATCGCTACAATTTCTCAGCTCAAGTCCTCCTTGATCAAAGACCTGGCTAAGCAGATCTCATAGTTGGGGTTATGCTGAAGAGACTTACGACTGTGTGCTGCCTTGTA AAAATTGTA ACTTATGCATGTTTTACTGTTAACTTTTTATTGCAATTTATTTTACGGATTTCTTCACTGCCATGGGTGAGCAAAGTAATCTTTTAA TGATTCAAAGTGTTTATGCAAGTTTGTACATTTGAATCAAATAAACTTTTTAAAGTTTT

Zebrafish *dazl*

GGTCGATTATGTGCATCTGTTCAGGAGAGCATAAATATTCGTCCAATTAAGATTTTTTTACCCTAAATGCCAGCTTGCCTAATGAAGAAACACGATAAGACCGTGTTCCGGATCTATCCGGTTTCCGGCCGCGTGTGGATTGAGCATTTAGAAAGTTAACGTTAGCGTTATTCGTTTAGCTTTTCGACGGACTTTGGGGTTTGT TTTTGTAAAAGCTTAGGTAGCAAACGCGTGGCCTGTTTCTCATTCAAATGGTTCAGGGGTTT CAGTTACCCGTGTGCCTGATATGTGGTTTTGTATTCACAGGATATCCAGAAGCATCGTCAGGGTTTTCCGTCCTCCCTGAAGTTGTCTAACGGTTACATTTTACCTGAGGGGAAAATGACGCCAACACACTGTTTCGTCCGGCGGTATTGATATGAAGGTGGATGAGAACGAGATCAGGGAATCTTTGCCAAGTATGGCTCAGTGAAAGAAGTTAAAATCATCACTTATCGAGGAGGAATTTGCAAAGGATATGGTTTCGTTTATTTCAAGTGA GGATGTTGATATCCAGACTATCGTTGATCAGCCGATCAGTTTTAAAGGGAAAAAACTCAA ACTGGGACCTGCAATCATGAAAGAGCGAAGTTCTCGGTGAGTGCATCTCCAATGATTGGTCCATCACAGTGGGTAAACCCACCCCATATATGTACTGCAGCTGCTGTCCCTCCAGGCCTGGCCCCACCATACCCGTATT CAGTGGAGGAAATCAGTACATGCAGCCTTATTCTTACTCAGTCCTCCAGGAATTATGGTTCCACAGGTGCCAATGAACTATGCACAGACCACGTATGCCTATCAGTATCCCCTGCCACAGTGGTGTGGAGAGCAAAGGACGAGGCTTGTCAATCAGAA TTTTGTGGATTGTGGAGTGCAGACTTTGCTAACCCCTTATGTAG

Mouse *Cyclin B1*

GGAACGGCTGTTAGTGTTTAGCTGTGGATAGCCAGAGGTTAGGGTGTCTTCTCGAATCGG

GGAACCTCTGATTTTGGAGGAGCCATGGCGCTCAGGGTCACTAGGAACACGAAAATTAAC  
GCAGAAAATAAGGCCAAGGTCAGTATGGCAGGCGCCAAGCGTGTGCCTGTGACAGTTACT  
GCTGCTTCCAAGCCCGGGCTGAGACCGAGAAGTCTCTTGGAGACATTGGTAATAAAGTC  
AGCGAAGAGCTACAGGCAAGAGTGCCTCTGAAAAGGGAAGCAAAAACGCTAGGTACTGGA  
AAAGGTACTGTTAAAGCCCTACCAAAACCTGTAGAGAAGGTGCCTGTGTGTGAACCAGAG  
GTGGAACCTTGCTGAGCCTGAGCCTGAACCTGAACCTTGAACATGTTAGAGAAGAGAAGCTT  
TCTCCTGAACCTATTTTGGTTGATAATCCCTCTCCAAGCCGATGGAAACATCTGGATGT  
GCGCCTGCAGAAGAGTATCTGTGTCAGGCTTTCTCTGATGTAATCCTTGCAGTGAGTGAC  
GTAGACGCAGATGATGGGGCTGACCCAAACCTCTGTAGTGAATATGTGAAAGATATCTAT  
GCTTATCTCCGACAACCTGGAGGAAGAGCAGTCAAGTTAGACCAAAATACCTACAGGGTCGT  
GAAGTGACTGGAAACATGAGAGCTATCCTCATTGACTGGCTAATACAGGTTTCAAGATGAAA  
TTTAGGCTGCTTCAGGAGACCATGTACATGACTGTGTCCATTATTGATCGGTTTCAATGCAG  
AACAGTTGTGTGCCAAGAAGATGCTACAGCTGGTCCGGTGTAAACGGCCATGTTTATTGCA  
AGCAAATATGAGGAGATGTACCCTCCAGAAATAGGTGACTTCGCCTTTGTGACTAACAAC  
ACGTACACTAAGCACCAGATCAGACAGATGGAGATGAAGATTCTCAGAGTTCTGAACTTC  
AGCCTGGGTCGCCCTCTGCCTCTGCACTTCCTCCGTAGAGCATCTAAAGTCGGAGAGGTT  
GACGTCGAGCAGCACACTTTGGCCAAATACCTCATGGAGCTCTCCATGCTGGACTACGAC  
ATGGTGCATTTTGTCTCTTCTCAAATTCAGCTGGGGCTTTCTGCTTAGCGCTGAAAATT  
CTTGACAACGGTGAATGGACACCAACTCTGCAGCACTACCTATCCTACAGTGAAGACTCC  
CTGCTTCCTGTTATGCAGCACCTGGCTAAGAATGTAGTCATGGTGAACCTGTGGCCTCACA  
AAGCACATGACTGTCAAGAACAAGTATGCAGCATCTAAGCATGCTAAGATTAGCACGCTG  
GCACAGCTGAACTGTACACTAGTTCAGAAATTTGTCTAAGGCCGTGACAAAGGCATAACTC  
CAATAGACTGCTACATCTGCAGATGCAGTTGGCACCATGTGCCGCCTGTACATAGGATAC  
CTACCGTGTTTACTTGCTCTTCAAATAAAGGTTGTGACTTCTCATTTTACATAGCTTAACT  
CATTTGAATGTTGTTGCTTCTGAGTTTAGGCTAACGGAAGTTGTGCAATTTAGGAGTATA  
TTAAAAACTGCATCTAGTTTTAACAGTGGATCCAATAATGTATATATCTGTAGCCTATA  
TGTCTATATACATCCTTCACTGTGTGTCTTATATCATCATGTCTTCTGCCTCACTCTAG  
TTTTAACTCTAAATCTACCAGCTAGTCTTTGTTCCATTTTCCAGTGGTTGCCACCTTTA  
ACCACTGTCTCTTGGTTTGTCAACTTTTCAGATCTGAAACCAAGTATCTTTTTTTATGTAA  
TTATTTATTTGTTCTTAATTGGAAAATAGGATGTTCAAATTAAGGTGTGTTTTAAAAA  
GAATTTGCCCCCAAGTCTCACTATCAACAGATAAAGGTGATTCTTGTATATCCTGTATA  
GATATAATCATGCATATACTCCCAAGGAGATATTTTTATATGGGTTTCAATTTTATCAACAG  
TATTCCTATCAGCATTCCTTTCAATGCCTATATTGCATTTCTTAGTGTGAACAAACTGTG  
TGTAACATAGTCATTCCTCGGTGGGATTCAAGTGCATTTCTCAGTGCCTCCACAGTG  
TTCTTAAATGATGTTTAAATGTCTTGCTTGGCTTCATTCATAGTAGCTCTTCCAGGGGTGT  
GCTTTGAATTTCTGACAGCCAGATGGGTGTGGCTGCCACCATAACCAAGGCGCCACTCCTGT  
CTTGTAATGCCACCTGGAAAAGAATCCTGTCTCATTTGCTGTTTTAATTTATACATCTGA  
TATCAAGTTGAATAAAAATTTATTGGTGGAAAGCTTT

Mouse *Dazl*

AGTGACTCGGCGACCCTCAGCACGCTCGCTTTCGGGACTCCGCTGTCTCCGTGGCCGTGGG  
CTCTCTTTCCACCACCGCCTCGGCTTTTTTTTTGCCCCTGGCCGGCTAGGCAGCCACCTC  
ACGTAGCTGCCCCGTGCGGTGGCTTCTGCTCCACCTTCGAGGTTTTACCACCCGAACCTCT  
GGCCGCCATCATGTCTGCCACAACCTTCTGAGGCTCCAAATTCAGCTGTCTCCAGGGAGGC  
CAGCACTCAGTCTTCATCAGCAACCACAAGTCAAGGATATGTTTTGCCAGAAGGCAAAAT  
CATGCCAAACACCGTTTTTGTGGAGGAATTGATGTTAGGATGGATGAAACCGAAATCAG  
GAGTTTCTTTGCCAGATATGGCTCAGTAAAAGAAGTGAAGATAATCACTGATCGAACTGG  
TGTGTCGAAGGGCTATGGATTTGTCTCATTTTATAATGACGTGGATGTGCAGAAGATAGT  
AGAATCACAGATAAATTTCCATGGTAAAAAGCTGAAACTGGGCCCTGCAATCAGGAAACA

AAATTTATGTACTTATCATGTGCAGCCACGTCCTTTGATTTTTAATCCTCCTCCTCCACC  
ACAGTTCCAGAGTGTTTGGAGTAGTCCAAATGCTGAGACTTACATGCAGCCTCCAACCAT  
GATGAATCCTATCACTCAGTATGTTTCAGGCATATCCTCCTTATCCAAGTTCACCAGTTCA  
GGTCATCACTGGATATCAGCTGCCTGTTTATAACTACCAGATGCCACCGCAGTGGCCTGC  
TGGAGAGCAGAGGAGTTATGTTATACCTCCGGCTTATACAACCTGTTAACTACCCTGCAG  
TGAAGTTGATCCAGGAGCTGATATTTTGCCTAATGAATGTTTCAGTTCATGATGCTGCTCC  
AGCTTCTGGAAATGGCCCGCAAAGAAGTCTGTGGACCGAAGCATAACAGACAGTGGTCTC  
TTGTCTGTTTAAACCCTGAGAACAGACTGAGAACTCTCTTGTACTCAAGATGACTACTT  
CAAGGATAAAAAGAGTACATCACTTCAGAAGAAGTCGGGCAGTGCCTTAAATCTGATCATCT  
CTGC

Mouse *lncRNA-HSVIII*

TTCATCTTCCCTCACTAGTCATCATTTGCATATTCTCTTTTTTAAAGTGTTCTTTGTCCA  
GATAATTTTTATTGCTGATTTTTTAAAGCTATGCTTCATATATTCTGATAAGAGTATTAC  
ATCTAATCTTAGTTTGGCTTTTTAACTGGAGGTTGTGAAGAATTTTCTGTAATTCTTTTCC  
CCTAAGAAAAAGTGTTTCTAGTTTTAGCCTTGACACTTATGTCTGTGATTAACAAGTTAA  
TTTTTGTGTTGGCACATGGCAGAGATCAGAGTTTGTATTTTCGACGCCTTTAATGCTCAT  
TAAATGGTTGCAATCTGATTTGTTGACATGCATTTGTTTCAACATCAGTTTGAACCACTA  
ATTGACAGTATATTTCTGCACCTGTTCTTACTTACTGATATCTGTAGACATAACTTTTTTT  
CAGCCTACTTTTAAATAAGGGTTCAACCTCTCCTCTAGCTCACCACCAGCAGAGGTAGTG  
GAAGAGAACAGTTATTAGGCTATGGGGGAAGTGGATCTGTTTCAGCAAGAGTTCCTTGGGG  
GCGAGCTCAGTCTTCTTGGCAGCAGCCCAGTCCCATGGCAAACACCAAATGTGACTCAG  
CAGCTGCAGACCAGTCTCTAGGCAGGCAGACACCAGGCATGAACCAGCAACTGTAATTC  
AATCCTGAAGAAACCAAGGCTCACCAACTGGCCTGAGGAGAGGCCGAGAAAGCAGCAAGC  
TGCCTAAGGAACCTCATGAGCAGTCTTTGGCCAGTTTCTCTCAATGGCATCACTAGTTG  
AGATCAACAATGCTATGTAGGGCAAACCATAACCAACAAATACACGCATGTCACTGTAT  
AGCGAGGTGGAGAAAATCAGACCAAGGCTCAGTGCTGTCTCCACGCTCTGTGGGGTCAT  
AGTTATACTCCTTCATGGCAGGTCTTTTACGTGCTTGTATATCAAAACATCCTTTTAC  
CTGTGTGGCCTCAGGAAAACATTTCTTTTACATGTCTGTTTTTAGCAAGACATCCCTTAC  
CTGTGTGTCCCAGCAAACATCATTTGATGTAACTTAACTTTCAAAGAAACTAGAAGTT  
TCCACTTCACATATCTATCTACATATTCTTAAAGTACAATACAGCTCTATCCCAGATATTG  
TGACTTGTGATCTTGTGATTCGGTAGTGTGTACTTACAGGTTTATTACATTTTTTCAAG  
CTGCAGTCTTCTTGGAACTTATATGTTGATTCTAAAATGTGTATGGAGGGCTTCAGTGAC  
AGCTCAGTTTGTAAAGTGCTTGCTGCATCTGCAACCATGATGACTTGAGTTCAACCCCCA  
GCCCCACATAAAAAGCCAGGCATGGTGGTAGGTACCTATGATCCCAAGGGCTGGAGAGGC  
AGAAGCCAGTAGACCTCTGGGACTGCTTAGGCAGCCAGCTCAGCCTAACAGACAAATCCA  
GACCCAGTGAGAGGCTCTGTCTCAAAAACGCAAAGGGAACAGCTTTGGAGGTGCAATACC  
CAAGGGTGACGTGTGGCCTCCGTGCTCAACACTTGAGCACATGTACCTGCACATACCTGA  
ATACACACTTGTATGTAAACACACAGATAAAATGGCTGGAGTGATGGCTTAGTGGTTAAG  
AGTGCTTGTACTTTTCTAGAGGGCCTGAGTTTGGTTCCAGCACCCGTGTCCAAGCTGC  
TCAGAACCATCTGCAACTCTAGTTCCAGAGTATCTGGCCTCTAAGGGCACCTGCACATGT  
GTTTGCATATACACTCATAAATAAAAATAAAATAAATCTTTAAAATGTGCGCCCCGCTC  
TCGGCCAGCAAGAACGACGCGACCACCAGTCTTCTAACAGCAGTTTATTAGTCTCTGAT  
TCTTCTTGTATATCTCCCCTGAACCCTGGGCCCTCTCACTCCTTTTATACTCTCTCTCA  
TCCACGCACCGCAGGCCACGCCCCCTCGCCAGTCACGAGGCTTCAGCTAATCAGGGCAGC  
AGGGGCAAATCTCCACCAAATTTGGATTACCTGTATCCTGGTACACCTGCGCAGCACTCA  
AGATGTTTGTGTCTTATATGAGGAAGTCAGGTGCAAGTCATATGACTTAGCTGCAGTCCC  
TGGCGCCTTTGGGACTGCCGCCACACCCGCTCCCCACATAAAAATGTATATTGAAAGATG  
AAAAGACTCAGAATGACTAATACCAACAATATAGGTTTTCAAGACTTTAAAATGATATGCC

AGTCAATACAGGGATGTGTTGTCATTGGGGCAGAAATATAGATCAGTAGAACAGAACAAG  
GAATCTGGAAATAGGTCCACATCTATTCAGCCAGATGATCTTGATGAGAGTACTAATGTA  
ACCCAATGGGGGAAAAGATAGTATTTTTACTTAGTAAATGATGCTGAGGGTTTAGGAATG  
CACTTCAGTATAGAGGAGCTCTTATCTAGTGTGCATGAGGGCCTTAGTTAATACCTAGC  
ACCACAAAAACAAAGGGTGTTAGAACAGTGGCCTTTGTGCCTGGTGTGGTTGCGCACAC  
CTTTAATCCCAGCACTTGGGAAGCAGAGGCAGGTAGATCTCTGTAAGTTCGAAGCCAGCC  
TGGTCTACACAGAGAGAGAGAGAGTTCAGAACAGCCAGGGCTACACAGAGAAAAGAAAA  
GAAAAGAAAAGAAAAGAAAAGAAAA

---

Open reading frame (ORF) sequences are highlighted with gray boxes.

## Supplemental Figures Introduction

Supplemental figures show results of experiments independent from those shown in Figs. 2-6 and experiments using the control sense probes. Figure S1 shows results of experiments independent from those shown in Fig. 2C and D. The signals were detected in oocytes of sections hybridized with the antisense RNA probe but not in those hybridized with the sense RNA probe. Figure S2 shows results of experiments independent from those shown in Fig. 3 and experiments using the control sense probes. No signal was observed in the oocytes including the animal polar cytoplasm beneath the micropyle using the sense probes. Figure S3 shows results of experiments independent from those shown in Fig. 4 and experiments using the control sense probes. No signal was observed in the all stages of oocytes using the sense probes. Figure S4 shows results of experiments independent from those shown in Fig. 5 and experiments using the control sense probes. No signal was observed in the oocytes using the sense probes. Figure S5 shows results of experiments independent from those shown in Fig. 6 and experiments using the control sense probes. Slight signals were observed in the sections hybridized with the sense probes, showing fluorescence background in this procedure. In contrast, bright dot-like signals were observed in the nucleus of spermatocytes and the cytoplasm of round sperms in sections hybridized with the antisense probes. Explanations of supplemental figures in details are similar to those of Figs. 2-6.

## Supplemental Figure Legends

**Figure S1.** Single *in situ* hybridization of *Pou5f1/Oct4* mRNA in mouse ovaries. (A-D) Sections hybridized with the sense (A and C) or antisense (B and D) *Pou5f1/Oct4* RNA probe with amplification of signals using the TSA system (+TSA). Bars: 100  $\mu\text{m}$ .

**Figure S2.** Double fluorescence *in situ* hybridization of *mos* and *cyclin B1* mRNAs in zebrafish ovaries. (A-C) A section hybridized with the sense probes for *mos* and *cyclin B1* mRNAs in a fully grown oocyte. (D-F) A section hybridized with the antisense probes for *mos* and *cyclin B1* mRNAs in a fully grown oocyte. Bars: 50  $\mu\text{m}$  in A-C, 10  $\mu\text{m}$  in D-F.

**Figure S3.** Double fluorescence *in situ* hybridization of *cyclin B1* and *dazl* mRNAs in zebrafish ovaries. (A-D) Sections hybridized with the sense probes for *cyclin B1* and



*dazl* mRNAs. Follicles consisting of stage Ia (A), stage Ib (B), stage II (C), and stage III (D) oocytes. (E-H) Sections hybridized with the antisense probes for *cyclin B1* and *dazl* mRNAs. Follicles consisting of stage Ia (E), stage Ib (F), stage II (G), and stage III (H) oocytes. Bars: 20  $\mu\text{m}$  in A, B, E and F, 50  $\mu\text{m}$  in C, D, G and H.

**Figure S4.** Double fluorescence *in situ* hybridization of *Cyclin B1* and *Dazl* mRNAs in mouse ovaries. (A) A section hybridized with the sense probes for *Cyclin B1* and *Dazl* mRNAs. (B and C) Sections hybridized with the antisense probes for *Cyclin B1* and *Dazl* mRNAs. Bars: 20  $\mu\text{m}$ .

**Figure S5.** Fluorescence *in situ* hybridization of *lncRNA-HSVIII* in mouse testes. (A-B) Transverse sections of seminiferous tubules hybridized with the fluorescein-labeled sense (A) and antisense (B) probes. (C-F) Transverse sections of seminiferous tubules hybridized with the DIG-labeled sense (C and E) and antisense (D and F) probes. Bars: 50  $\mu\text{m}$ .

+TSA

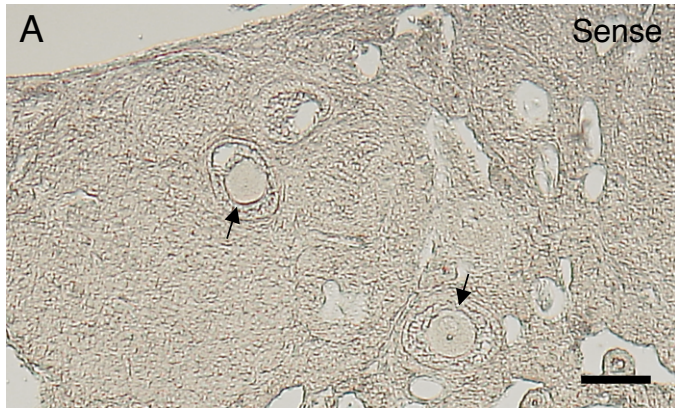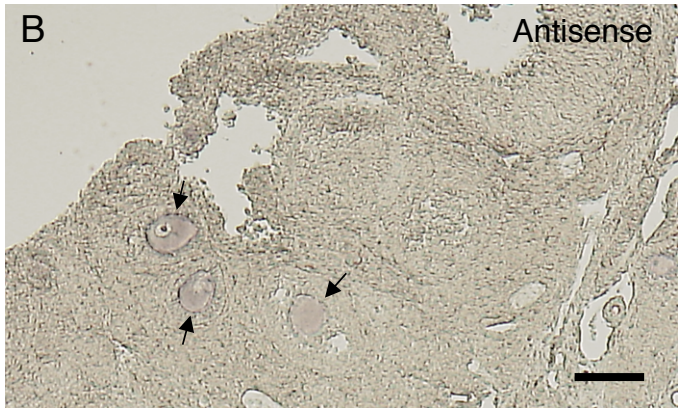

+TSA

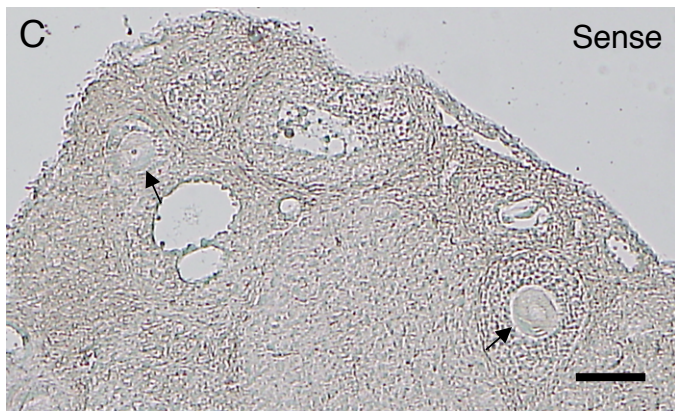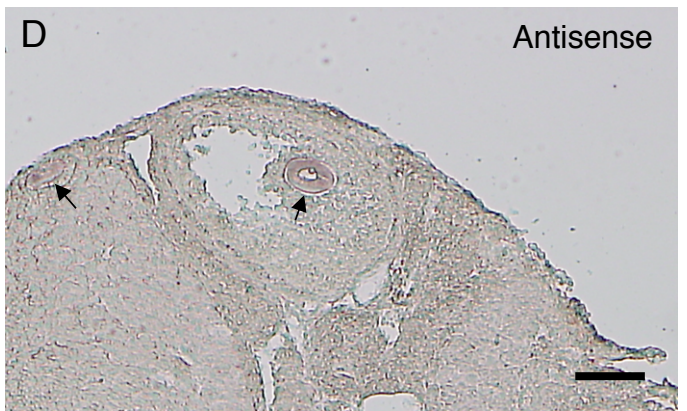

Figure S1

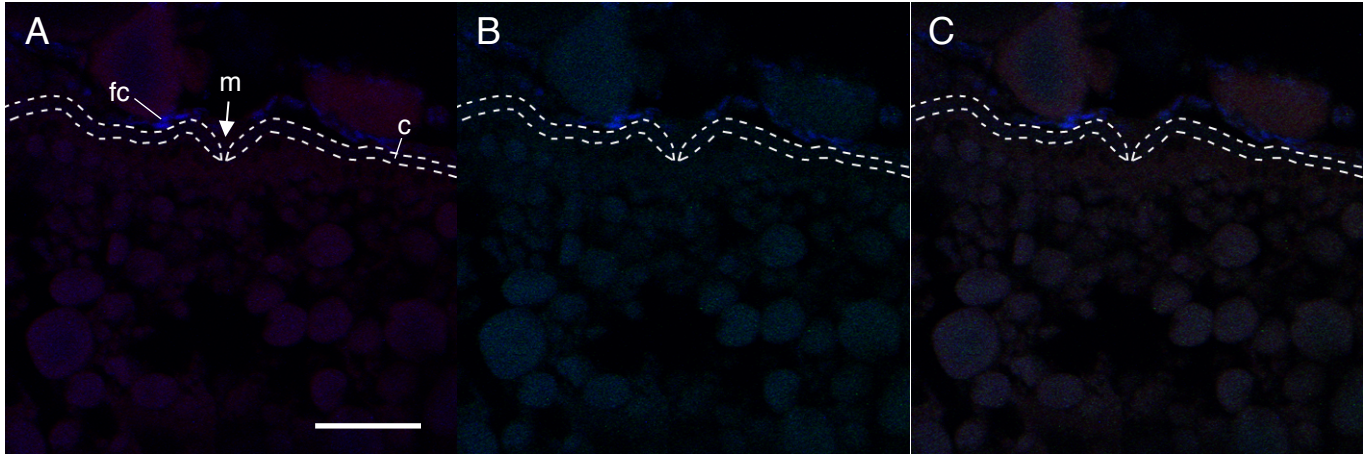

*mos* sense - *cyclin B1* sense - Hoechst

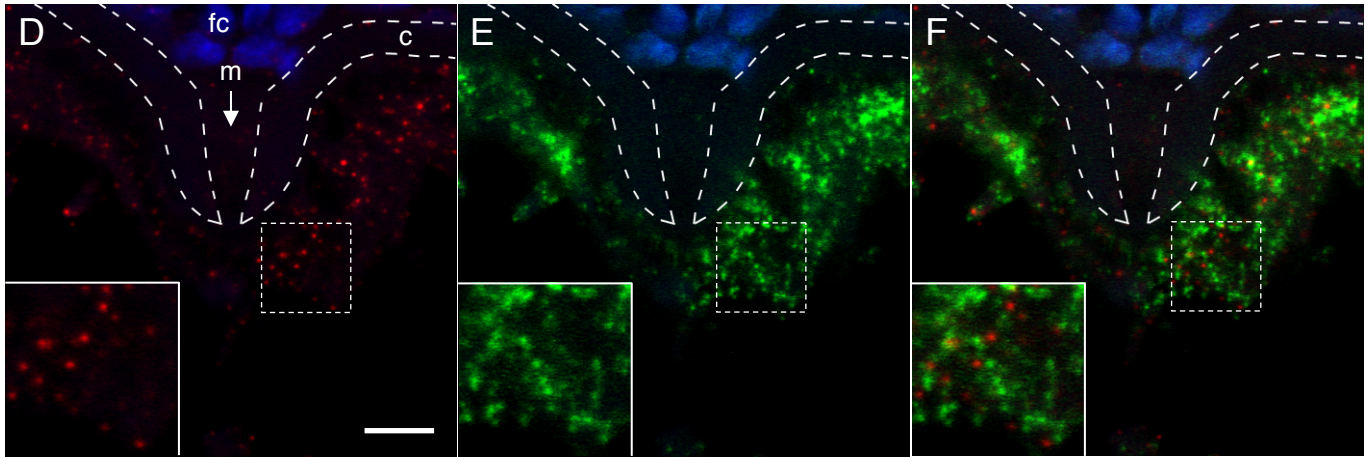

*mos* mRNA - *cyclin B1* mRNA - Hoechst

Figure S2

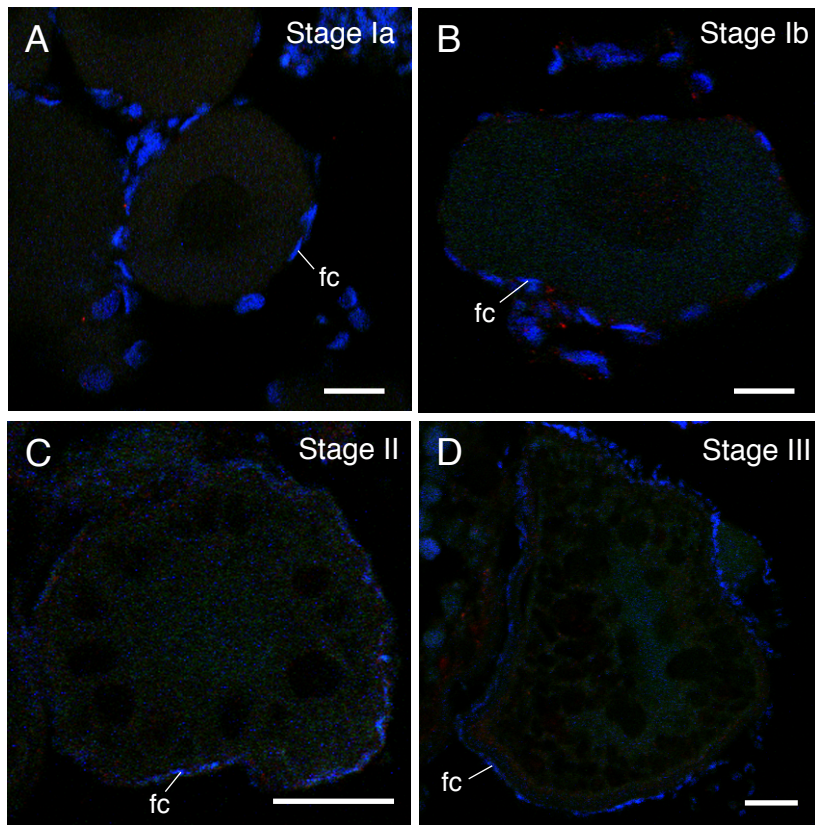

*cyclin B1* sense - *dazl* sense - Hoechst

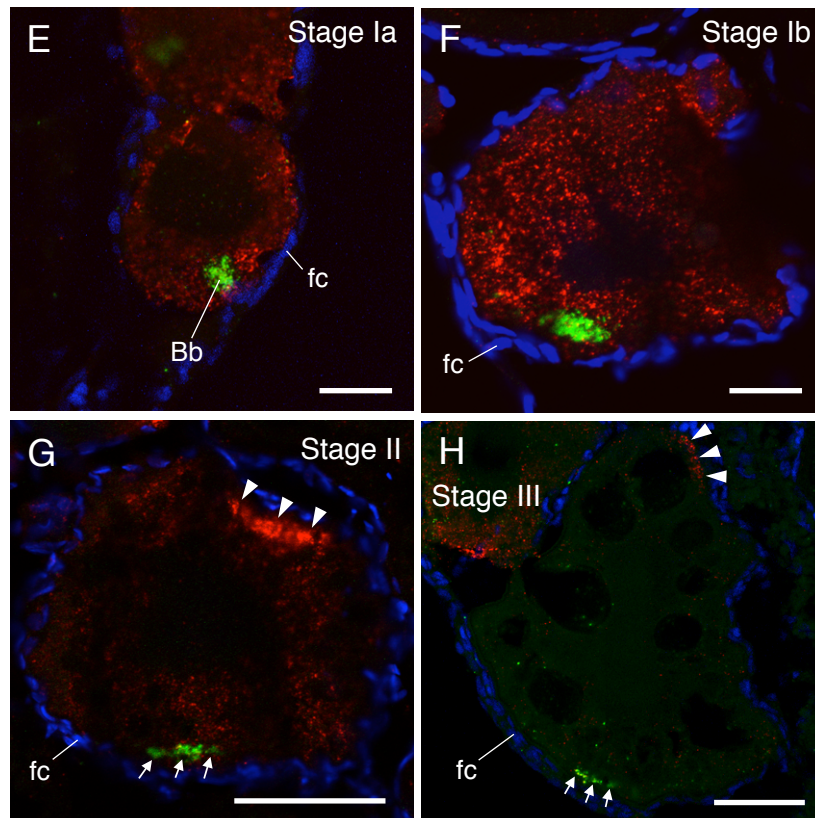

*cyclin B1* mRNA - *dazl* mRNA - Hoechst

Figure S3

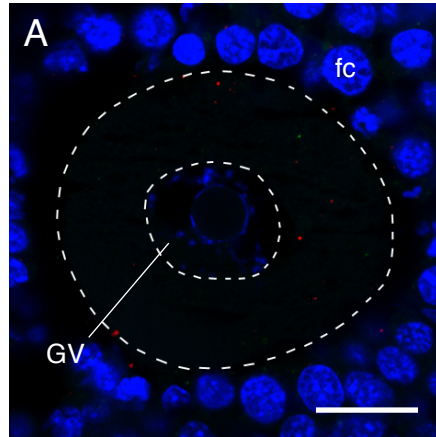

*Cyclin B1* sense - *Dazl* sense - Hoechst

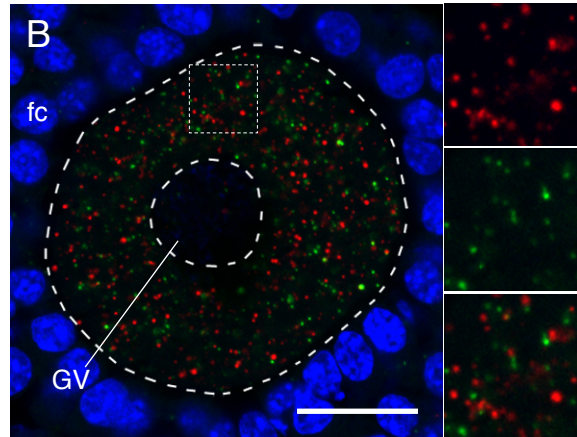

*Cyclin B1* mRNA - *Dazl* mRNA - Hoechst

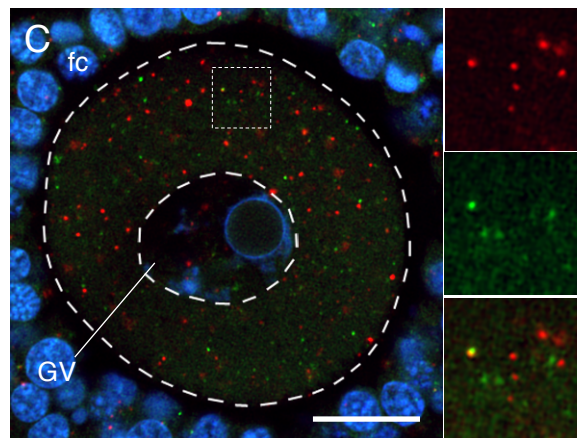

*Cyclin B1* mRNA - *Dazl* mRNA - Hoechst

Figure S4

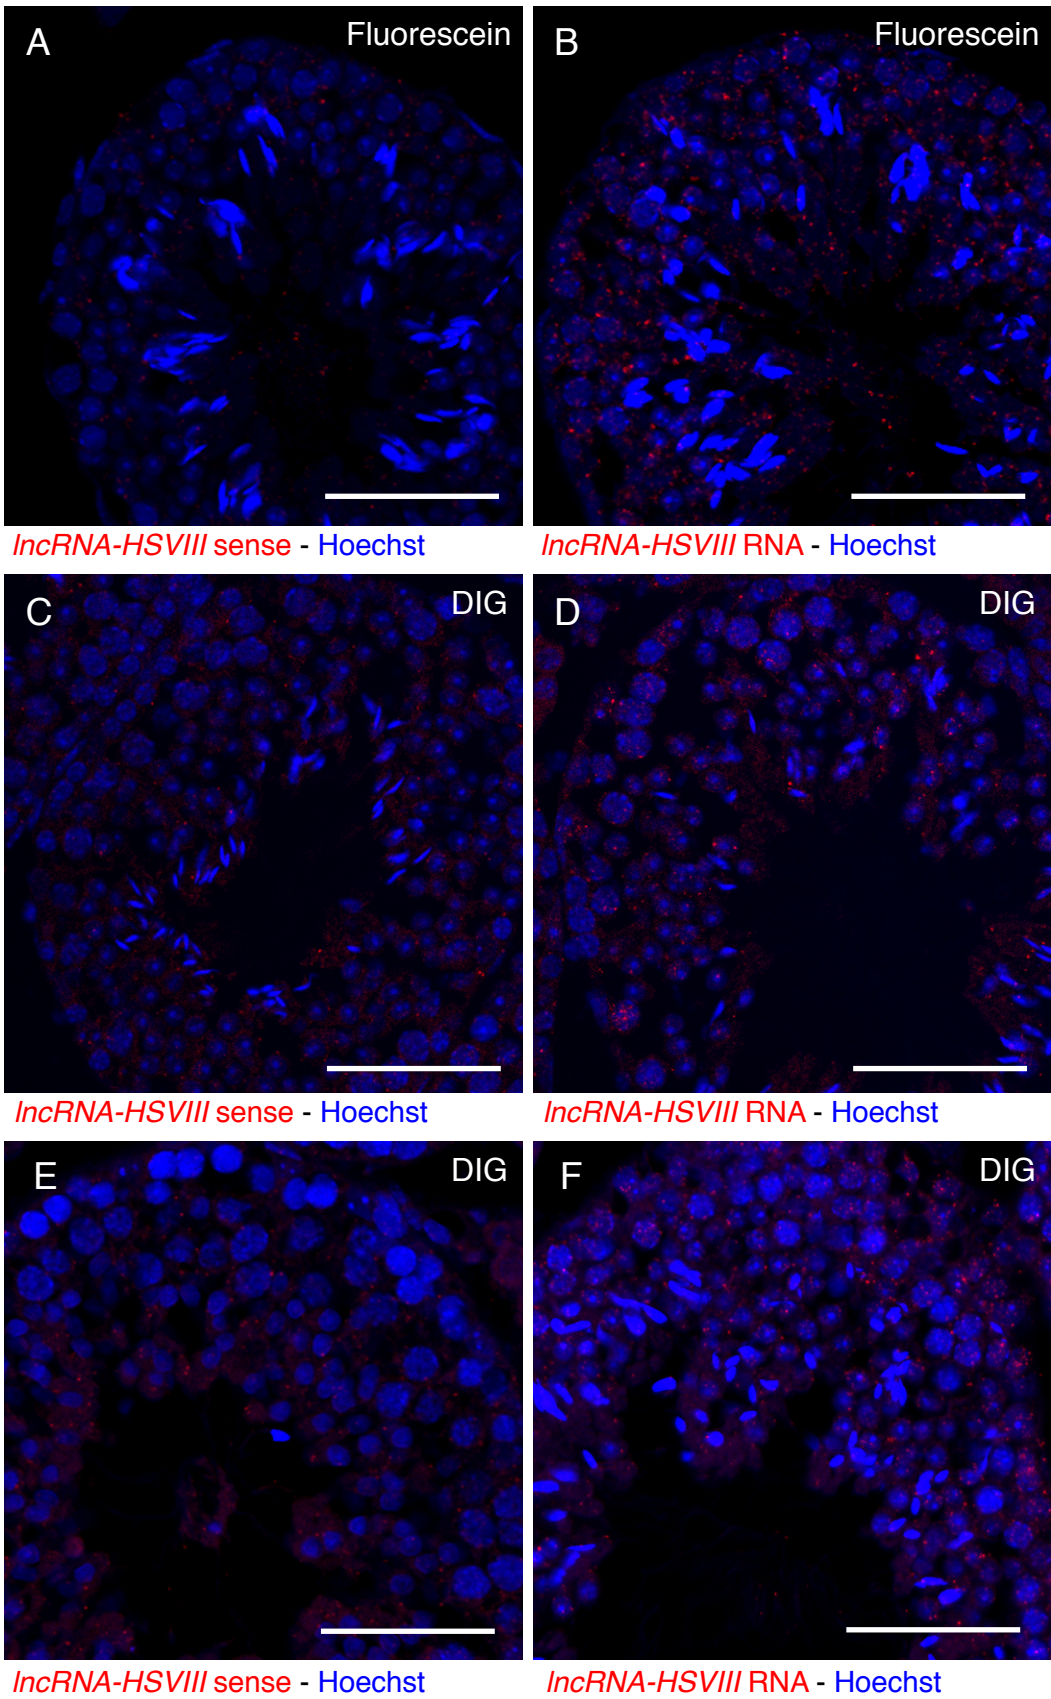

Figure S5
